# Supplementary material for: Dual-cure photochemical/thermal polymerization of acrylates: a photoassisted process at low light intensity
Source: Royal Society of Chemistry journal article supplement (doi:10.1039/c4py00548a), 2014-01-01
Supplement: c4py00548a1.pdf [file c4py00548a1.pdf]

## ***Electronic Supplementary Information***

### **Dual-cure photochemical/thermal polymerization of acrylates: a photoassisted process at low light intensity**

M. Retailleau, A. Ibrahim and X. Allonas\*

Laboratory of Macromolecular Photochemistry and Engineering, University of Haute Alsace

#### **Content:**

**1. Reproducibility**

**2. CRM measurements of thermal system with different TBH amounts**

## 1. Reproducibility

Depth profiles were measured by CRM at different reaction times (from 1 to 30 h) using a different monomer batch. Results are shown in Figure S1. A very similar behaviour as already observed in Figure 7 can be noticed: in the first 500  $\mu\text{m}$  of the sample, the polymerization is not complete after 45 min of reaction time with a conversion around 62 % and a 40  $\mu\text{m}$  inhibited layer. A pronounced characteristic peak of conversion can be clearly seen. After 1:30 h, a highly efficient polymerization with conversion around 95 % was achieved.

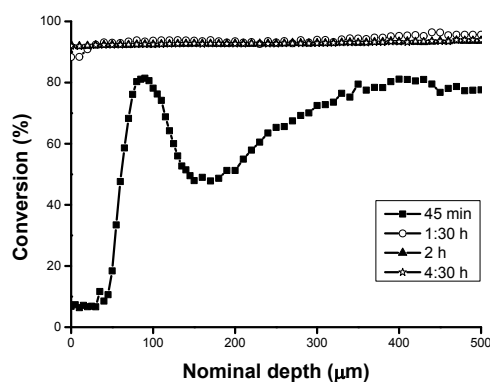

Figure S1 - Depth conversion profile of the polymer (E270/SR306; 0.2 wt %  $\text{Co}^{\text{II}}$ ; 0.5 wt % TBH) at different curing time.

## 2. CRM measurements of thermal system with different TBH amounts

Figure 3, Figure 4 and Figure 5 show the CRM depth profiles obtained with the thermal system while varying the amount of TBH: 0.2, 0.5 and 2 wt % respectively.

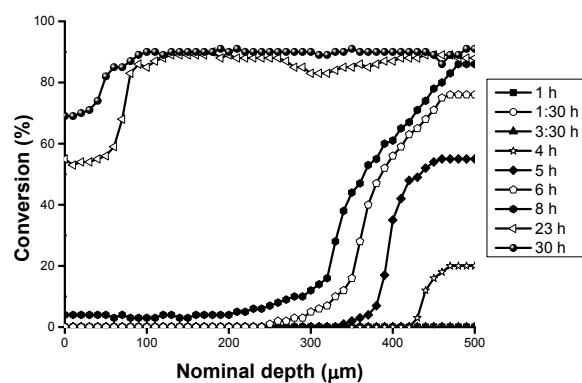

Figure 3 - Depth conversion profile of the polymer (E270/SR306; 0.2 wt % Co<sup>II</sup>; 0.2 wt % TBH) at different curing time.

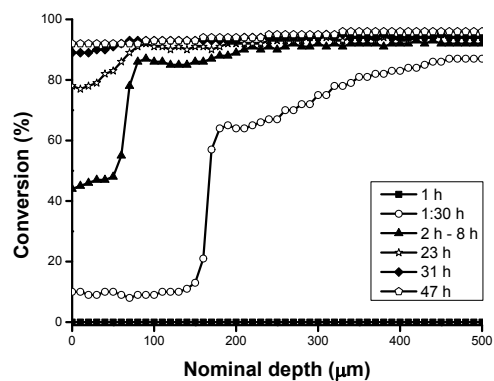

Figure 4 - Depth conversion profile of the polymer (E270/SR306; 0.2 wt % Co<sup>II</sup>; 0.5 wt % TBH) at different curing time.

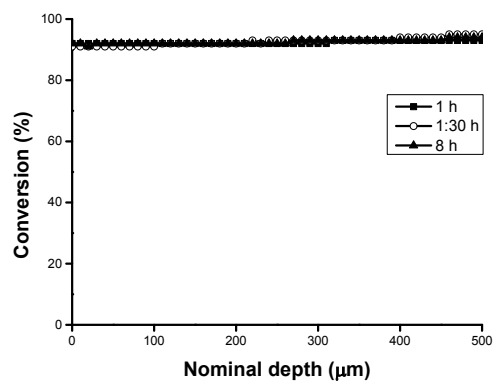

Figure 5 - Depth conversion profile of the polymer (E270/SR306; 0.2 wt % Co<sup>II</sup>; 2 wt % TBH) at different curing time.
